# Supplementary material for: The nucleoporin Mlp2 is involved in chromosomal distribution during mitosis in trypanosomatids
Source: PubMed Central journal article supplement — Nucleic Acids Res. 2015 Feb 17;43(8):4013–27. doi: 10.1093/nar/gkv056 (PMC4417144; doi:10.1093/nar/gkv056), 2015-02-17
Supplement: supp_gkv056_nar-01835-x-2014-File010.pdf [file supp_gkv056_nar-01835-x-2014-File010.pdf]

**Additional files**

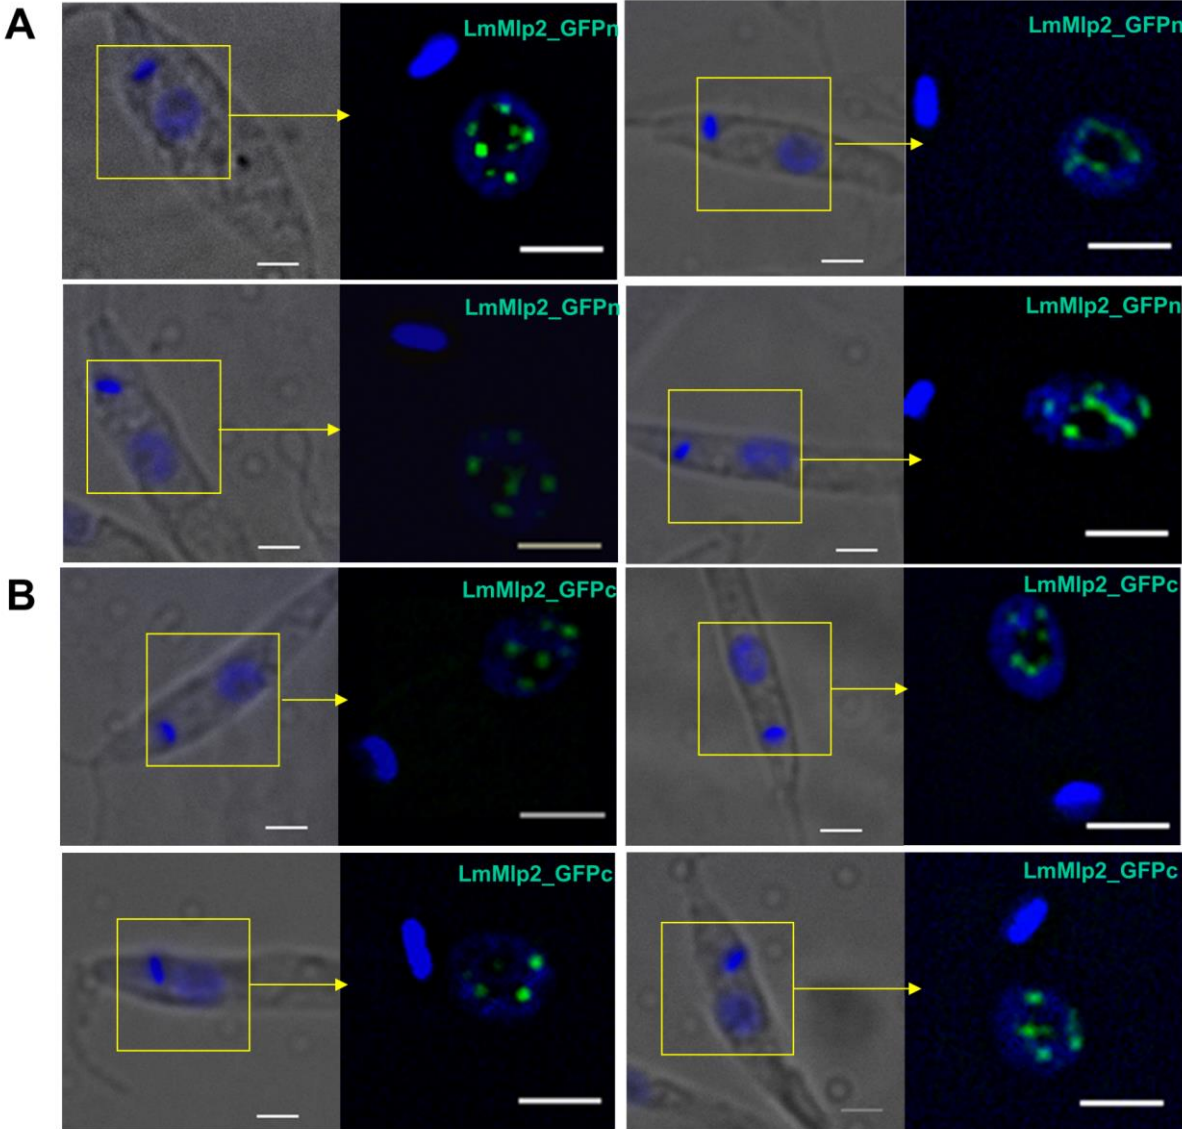

**Figure S1. LmMlp2-GFP localizes at the periphery of the nucleolus in interphasic cells.** LmMlp2 N-terminally fused to the GFP (LmMlp2-GFPn)(A) displayed a localization similar to that of LmMlp2-GFPc (B) as a limited number of more or less extended dots (green) in the nucleus, at the periphery of the nucleolus (yellow arrow).

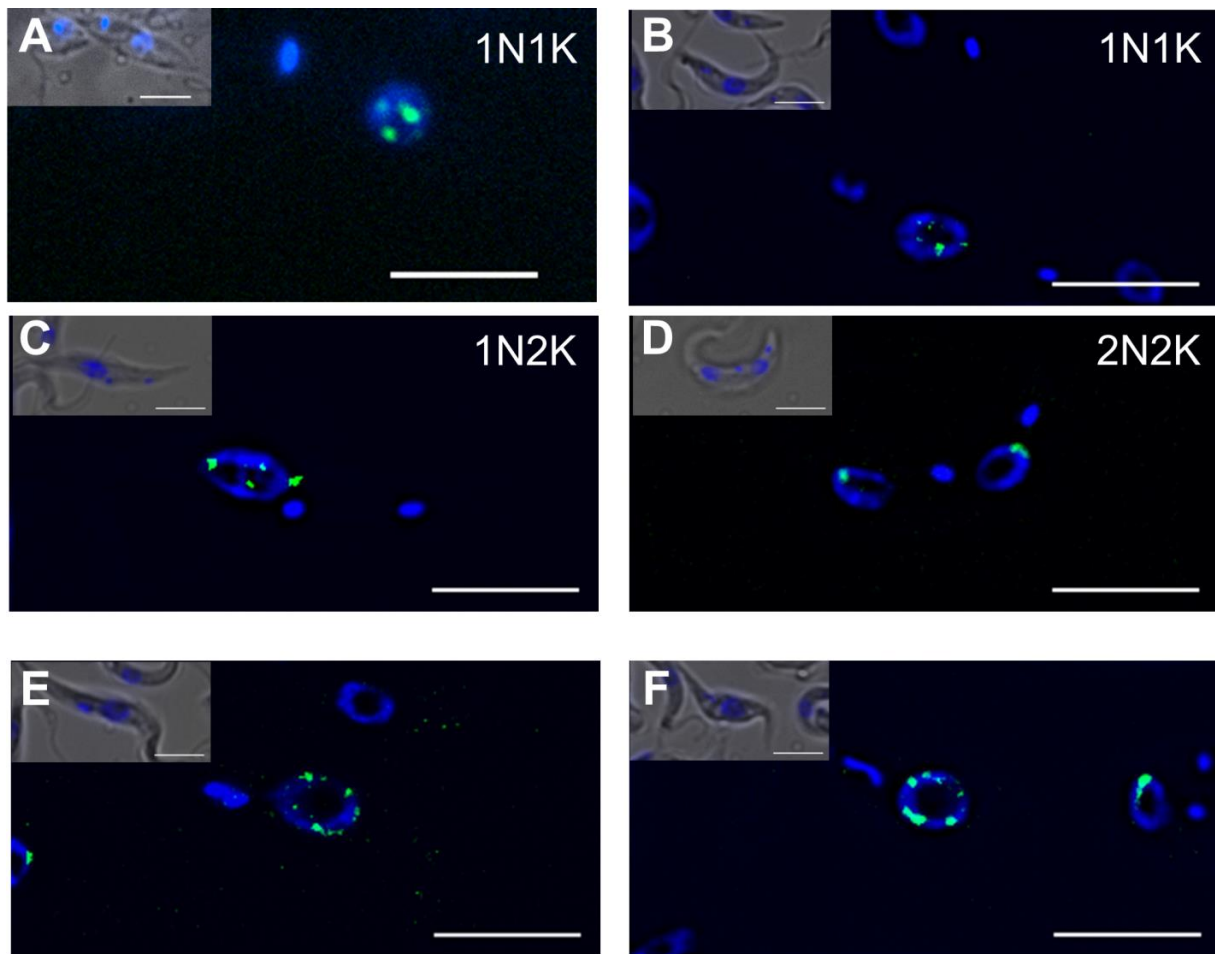

**Figure S2. Subcellular localisation of the nucleoporin Mlp2 in *Trypanosoma brucei* using C-terminal in situ GFP-tagging.**

(A-B) During interphase, isTbMlp2-GFPc (green) was essentially found in the nucleus, as a limited number of dots which localized at the periphery of the nucleolus. (C-D) During mitosis, the recombinant protein progressively relocalized to the spindle poles (see Fig. 2). (E-F) A perinuclear localization more typical of nucleoporins could be seen in <1% of interphasic cells.

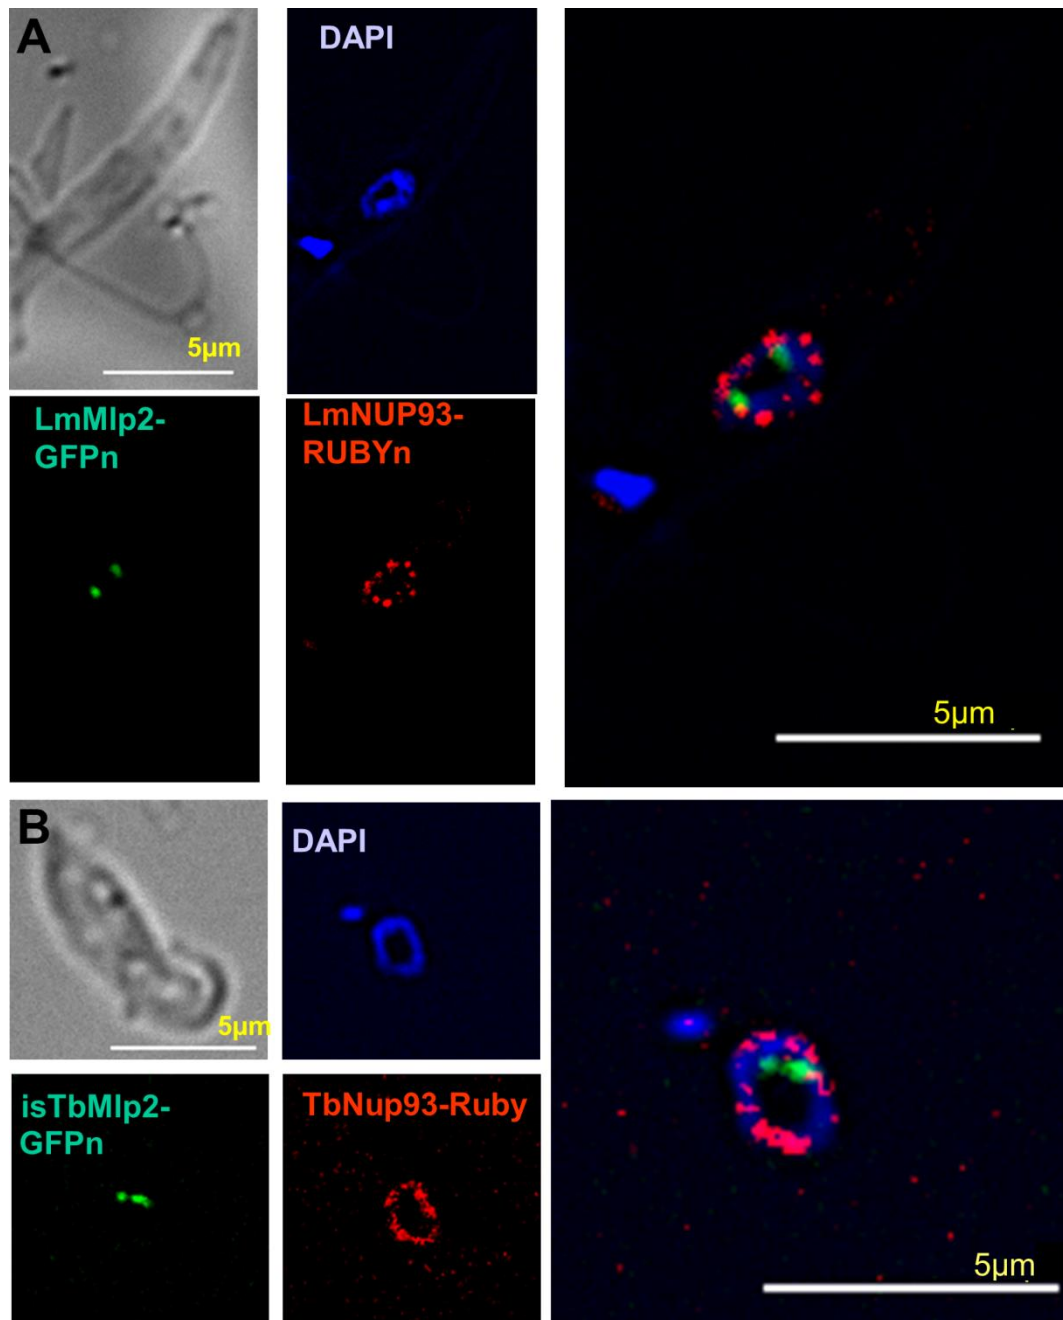

**Figure S3. Comparative nuclear localization of Nup93 and Mlp2 in *L. major* and in *T. brucei*.**

Both in *L. major* (A) and in *T. brucei* (B), Nup93-Ruby-n (red) was found decorating the nuclear envelope, whereas Mlp2-GFP-n (green) was present in the nucleus as a limited number of dots.

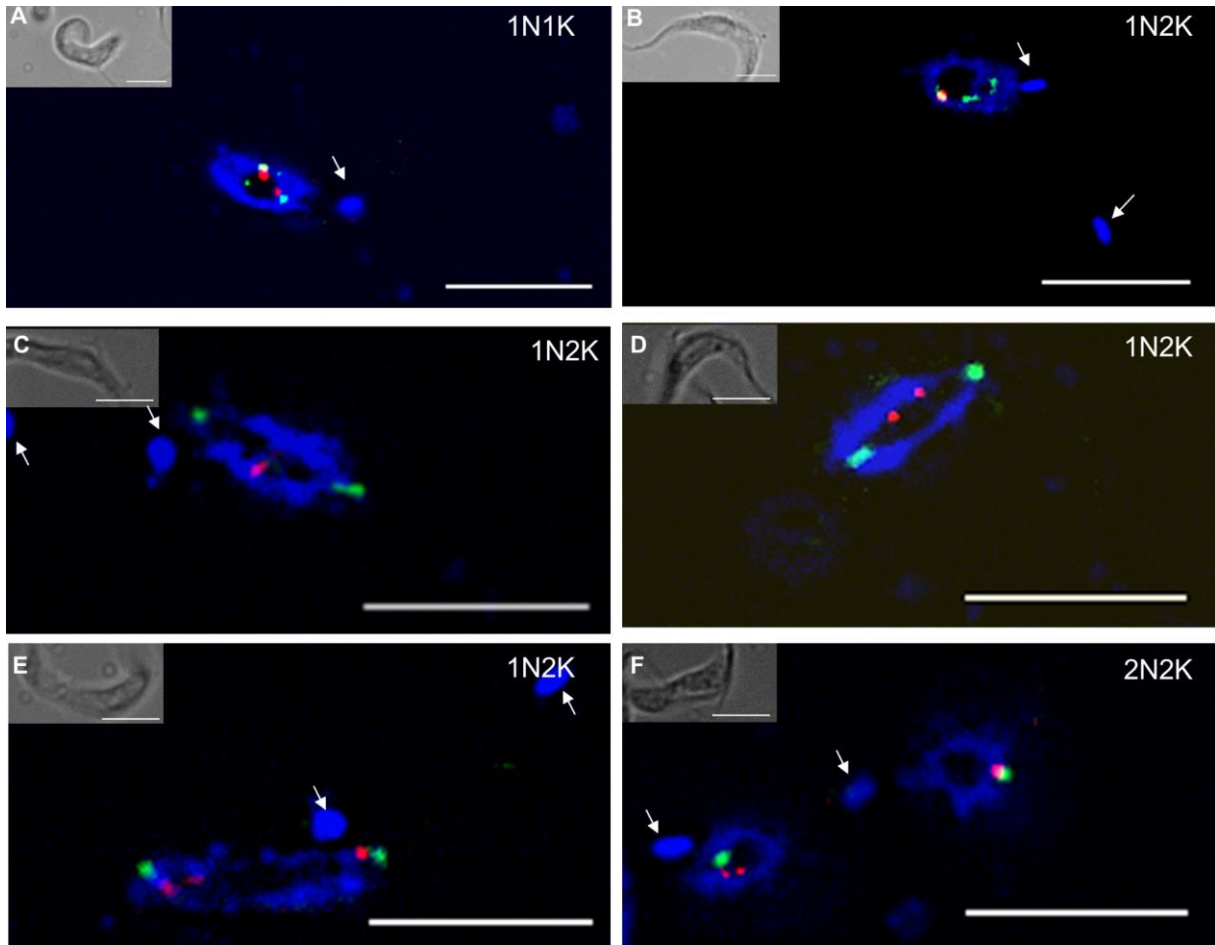

**Figure S4. Dynamics of the relocation of TbMlp2 and of the centromeres of chromosome 2 during the cell cycle progress.**

(A) In interphasic cells (1N1K), both isTbMlp2-GFPn (green) and the centromeres of chromosome 2 (red) were found at the periphery of the nucleolus. (B-D) During the nuclear division, a progressive migration of isTbMlp2-GFPn toward the mitotic spindle poles was observed. (E,F). The migration of the centromeres took place after isTb-Mlp2-GFPn had reached the poles. The data obtained with the centromeres of chromosome 2 (here) and chromosome 3 (Fig. 5) were similar. White arrows: kinetoplasts. Bar 5 $\mu$ m.

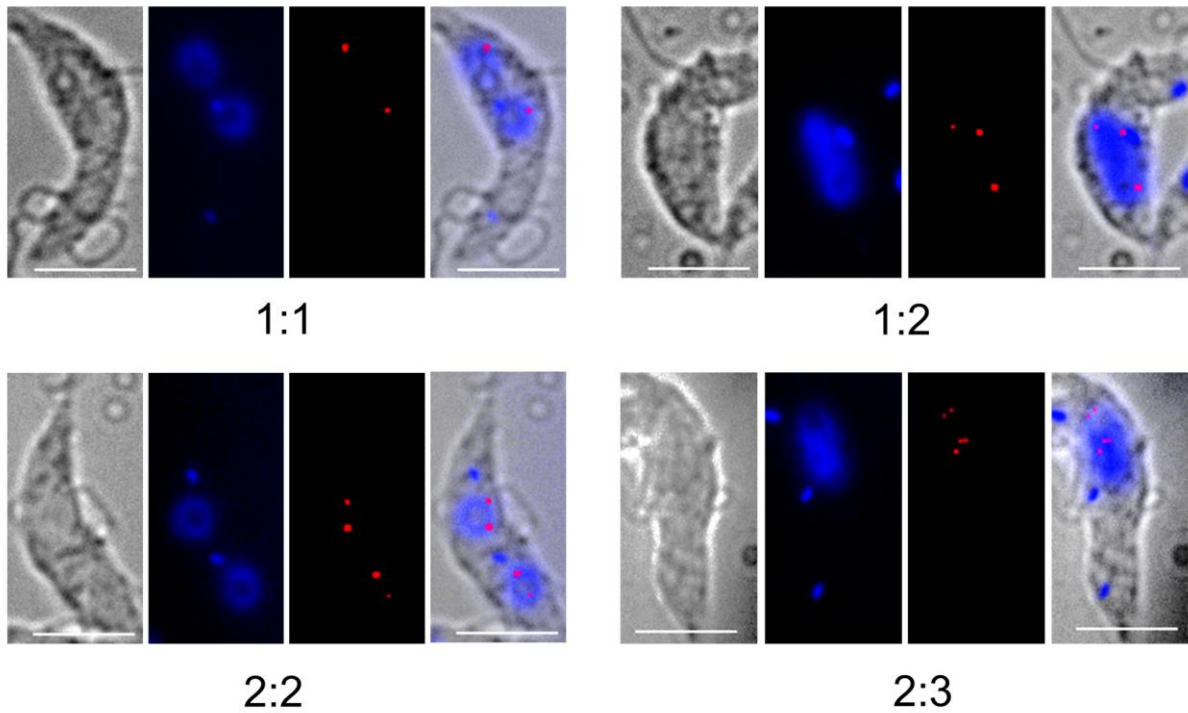

**Figure S5. The RNAi-based knockdown of TbMlp2 disrupts chromosomal distribution in mitosis.**

Aneuploidy may originate either from a replication defect or from an uneven segregation. Forty-three dividing cells were analysed: 29 symmetric divisions were observed, either 1:1 (N=3), 2:2 (N=21) or 3:3 (N=5); on the other hand, 14 asymmetric divisions were also found: either 1:0 (N=1), 1:2 (N=5), 1:3 (N=6), or 2:3 (N=2). These figures do not allow distinguishing between replication and segregation defects. We could therefore only infer that TbMlp2 depletion disrupts chromosomal distribution.

**Movie S1. Perinucleolar colocalisation of centromeric sequences of chromosome 3 and Mlp2-GFP-n in *T. brucei*.** TbMlp2-GFPn (green) and the centromere of chromosome 3 (red) were found at the periphery of the nucleolus.
